# Supplementary material for: Isolation and characterization of the dimetal decacarbonyl dication [Ru 2 (CO) 10 ] 2+ and the metal-only Lewis-pair [Ag{Ru(CO) 5 } 2 ] +
Source: Royal Society of Chemistry journal article supplement (doi:10.1039/d4dt03364g), 2024-12-06
Supplement: d4dt03364g1.pdf [file d4dt03364g1.pdf]

# Supporting Information

to

## Isolation and Characterization of the Dimetal Decacarbonyl Dication $[\text{Ru}_2(\text{CO})_{10}]^{2+}$ and the Metal-Only Lewis-Pair $[\text{Ag}\{\text{Ru}(\text{CO})_5\}_2]^+$

by

Malte Sellina, Jörg Grunenbergb and Ingo Krossing\*a

Dr. M. Sellin & Prof. Dr. I. Krossing\*; Institut für Anorganische und Analytische Chemie und Freiburger  
Materialforschungszentrum (FMF); Albert-Ludwigs-Universität Freiburg; Albertstr. 21, 79104 Freiburg (Germany). \* E-mail:  
[krossing@uni-freiburg.de](mailto:krossing@uni-freiburg.de)

### Content

|                                                   |   |
|---------------------------------------------------|---|
| IR Spectra .....                                  | 2 |
| NMR Spectra.....                                  | 3 |
| scXRD Data .....                                  | 5 |
| DFT Calculations .....                            | 6 |
| Coordinates of the DFT-Optimized Structures ..... | 7 |

## IR Spectra

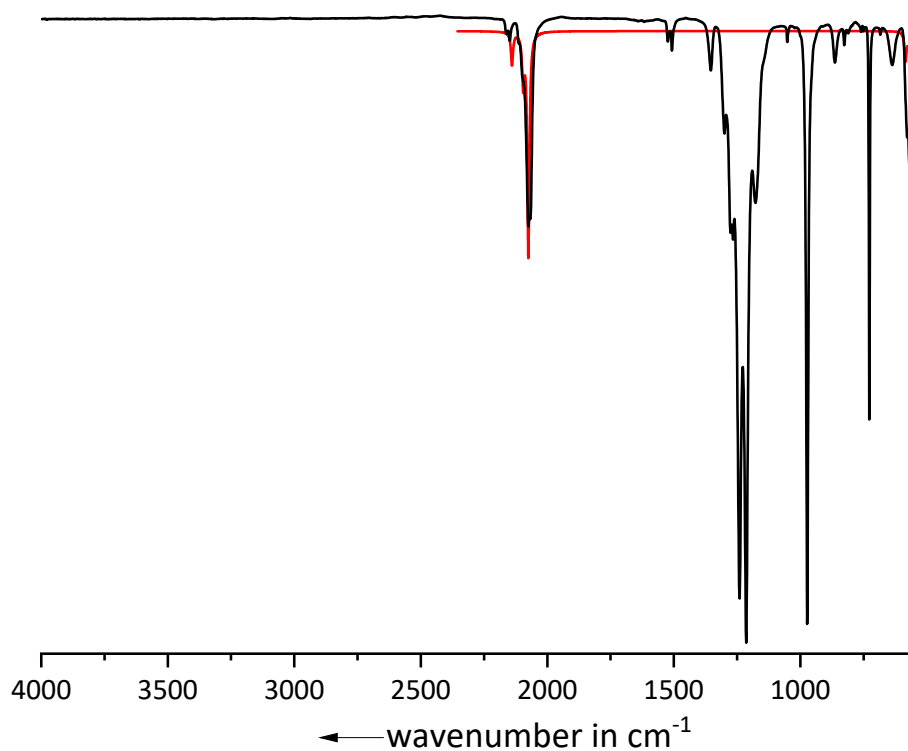

Figure S1: Comparison of the experimental IR spectrum of  $[\text{Ag}\{\text{Ru}(\text{CO})_5\}_2]^+[\text{F}\{\text{Al}(\text{OR}^{\text{F}})_3\}_2]^-$  (32 scans, black line) with the B3LYP(D3-BJ)/def2-TZVPP calculated spectrum of  $[\text{Ag}\{\text{Ru}(\text{CO})_5\}_2]^+$  (red line) scaled by 0.968 according to Duncan *et al.*

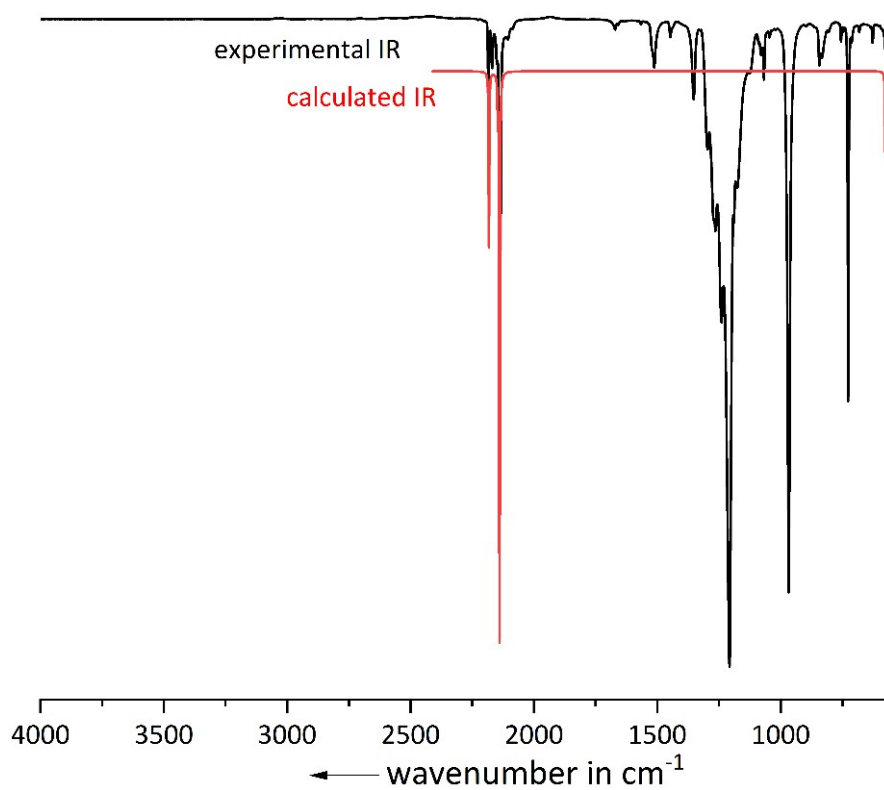

d

Figure S2: Comparison of the experimental IR spectrum of  $[\text{Ru}_2(\text{CO})_{10}]^{2+}([\text{Al}(\text{OR}^{\text{F}})_4]^-)_2$  (32 scans, black line) with the B3LYP(D3-BJ)/def2-TZVPP calculated spectrum of  $[\text{Ru}_2(\text{CO})_{10}]^{2+}$  (red line) scaled by 0.968 according to Duncan *et al.*

## NMR Spectra

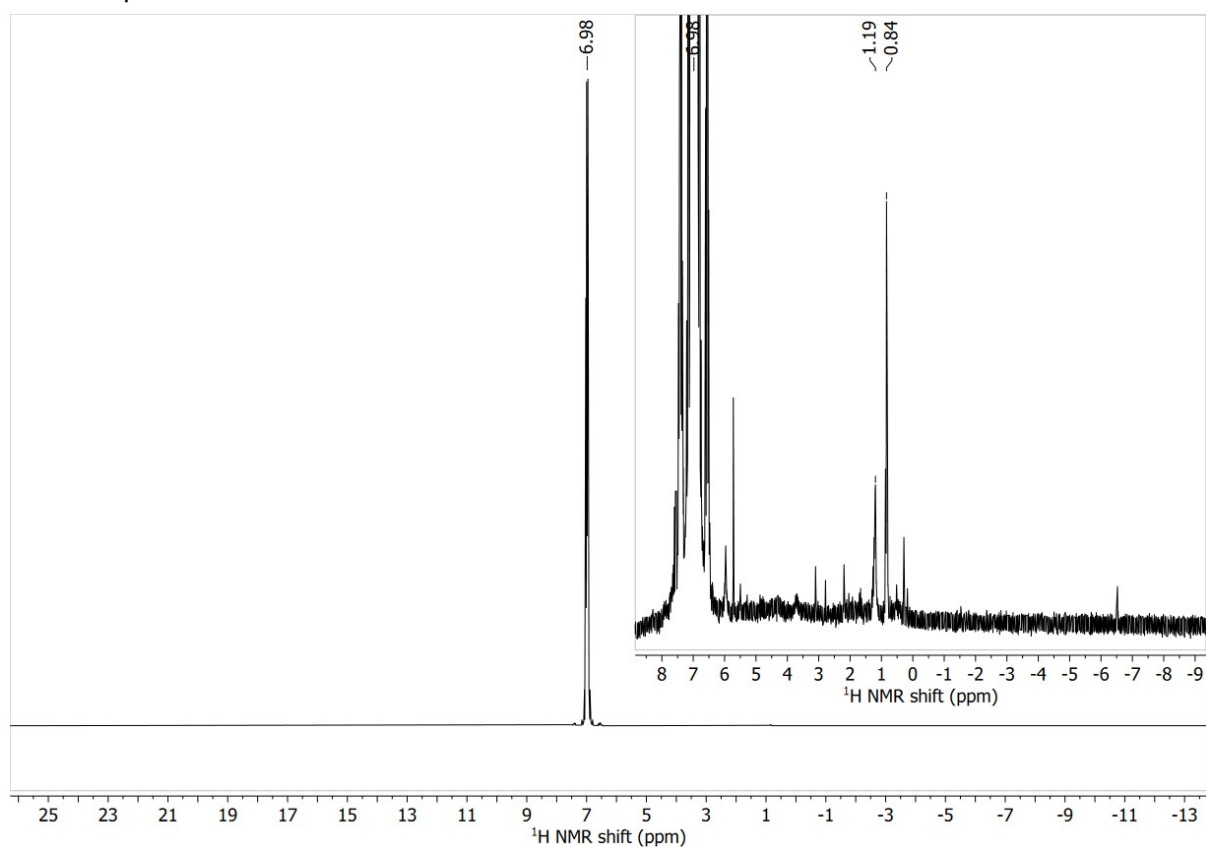

Figure S3:  $^1\text{H}$  NMR spectrum of  $[\text{Ru}_2(\text{CO})_{10}]^{2+}([\text{F}\{\text{Al}(\text{OR}^{\text{F}})_3\}_2]^-)_2$  in 1,2,3,4-tetrafluorobenzene (4FB) at room temperature.

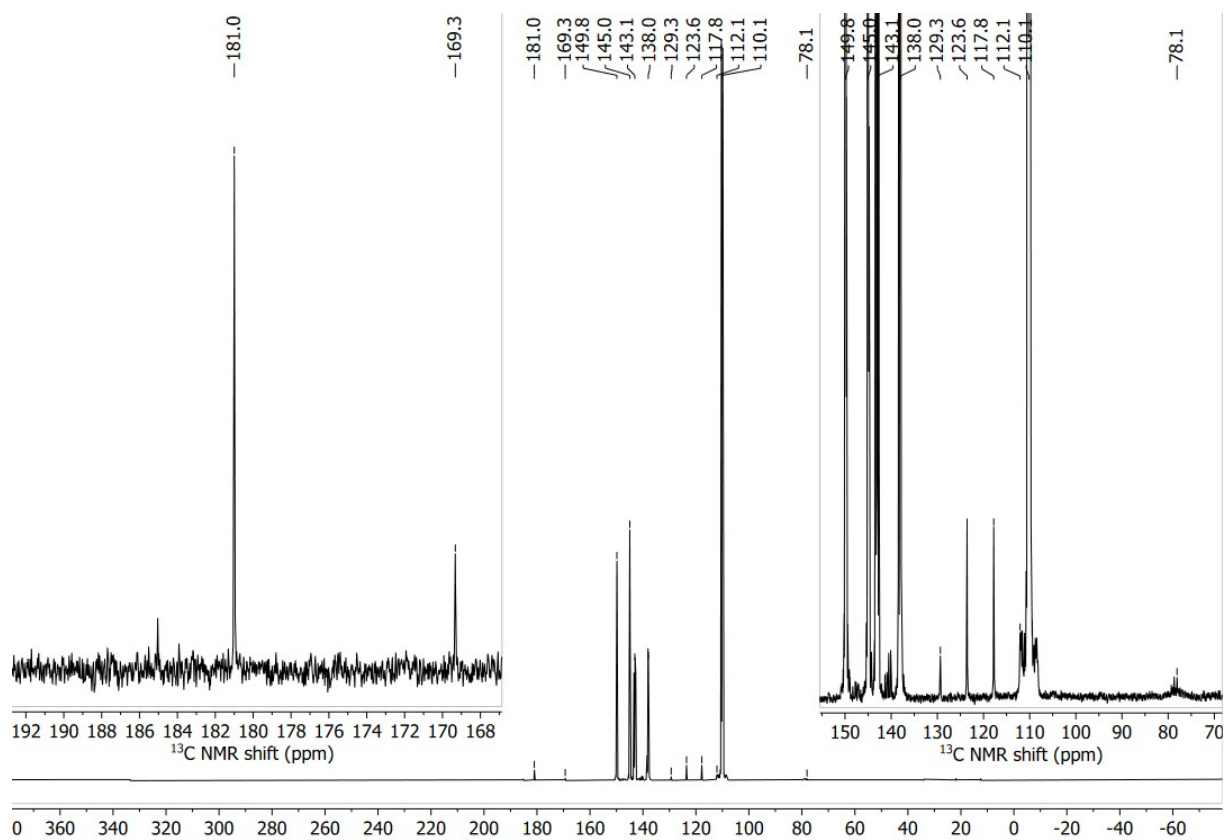

Figure S4:  $^{13}\text{C}$  NMR spectrum of  $[\text{Ru}_2(\text{CO})_{10}]^{2+}([\text{F}\{\text{Al}(\text{OR}^{\text{F}})_3\}_2]^-)_2$  in 1,2,3,4-tetrafluorobenzene (4FB) at room temperature.

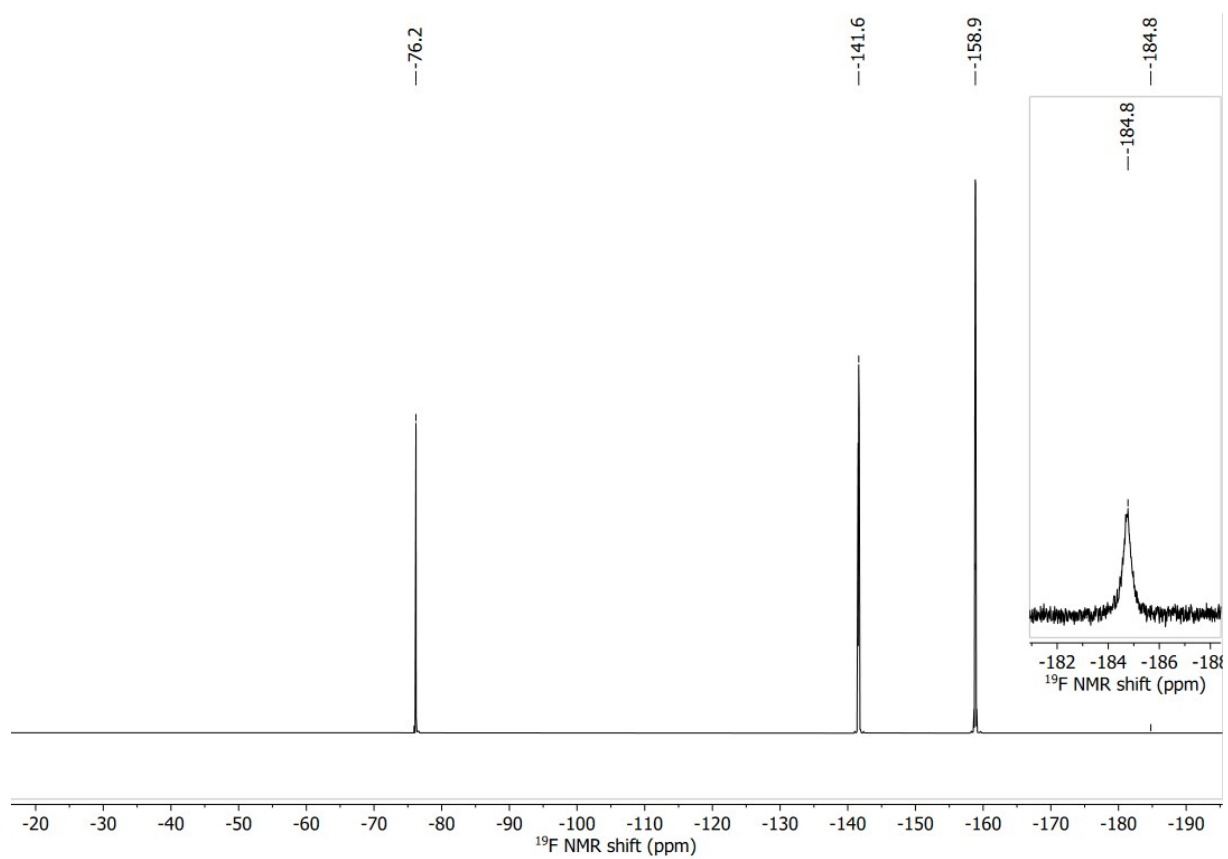

Figure S5:  $^{19}\text{F}$  NMR spectrum of  $[\text{Ru}_2(\text{CO})_{10}]^{2+}([\text{F}\{\text{Al}(\text{OR}^{\text{F}})_3\}_2]^-)_2$  in 1,2,3,4-tetrafluorobenzene (4FB) at room temperature.

## scXRD Data

Table S1: Crystallographic data table for  $[\text{Ru}_2(\text{CO})_{10}]^{2+}([\text{F}\{\text{Al}(\text{OR}^{\text{F}})_3\}_2]^-)_2 \cdot (4\text{FB})_2$ .

|                                                                   |                                                                   |                                                                            |
|-------------------------------------------------------------------|-------------------------------------------------------------------|----------------------------------------------------------------------------|
| CCDC number                                                       | 2390232                                                           | 2390017                                                                    |
| Empirical formula                                                 | $\text{C}_{34}\text{AgAl}_2\text{F}_{55}\text{O}_{16}\text{Ru}_2$ | $\text{C}_{70}\text{H}_4\text{Al}_4\text{F}_{118}\text{O}_{22}\text{Ru}_2$ |
| Formula weight                                                    | 2073.31                                                           | 3748.79                                                                    |
| Temperature [K]                                                   | 100(2)                                                            | 100(2)                                                                     |
| Crystal system                                                    | triclinic                                                         | triclinic                                                                  |
| Space group (number)                                              | $P\bar{1}$ (2)                                                    | $P\bar{1}$ (2)                                                             |
| $a$ [Å]                                                           | 11.005(4)                                                         | 12.594(3)                                                                  |
| $b$ [Å]                                                           | 24.541(7)                                                         | 19.643(4)                                                                  |
| $c$ [Å]                                                           | 24.767(10)                                                        | 23.887(6)                                                                  |
| $\alpha$ [°]                                                      | 64.588(17)                                                        | 90.031(12)                                                                 |
| $\beta$ [°]                                                       | 84.267(13)                                                        | 95.653(12)                                                                 |
| $\gamma$ [°]                                                      | 85.248(13)                                                        | 90.044(8)                                                                  |
| Volume [Å <sup>3</sup> ]                                          | 6005(4)                                                           | 5880(2)                                                                    |
| $Z$                                                               | 4                                                                 | 2                                                                          |
| $\rho_{\text{calc}}$ [gcm <sup>-3</sup> ]                         | 2.293                                                             | 2.117                                                                      |
| $\mu$ [mm <sup>-1</sup> ]                                         | 1.082                                                             | 0.537                                                                      |
| $F(000)$                                                          | 3952                                                              | 3604                                                                       |
| Crystal size [mm <sup>3</sup> ]                                   | 0.220×0.213×0.106                                                 | 0.249×0.215×0.198                                                          |
| Crystal colour                                                    | colourless                                                        | colourless                                                                 |
| Crystal shape                                                     | plate                                                             | block                                                                      |
| Radiation                                                         | $\text{MoK}_\alpha$ ( $\lambda=0.71073$ Å)                        | $\text{MoK}_\alpha$ ( $\lambda=0.71073$ Å)                                 |
| $2\theta$ range [°]                                               | 1.83 to 58.77 (0.72 Å)                                            | 3.25 to 56.67 (0.75 Å)                                                     |
| Index ranges                                                      | -14 ≤ $h$ ≤ 15<br>-33 ≤ $k$ ≤ 33<br>-33 ≤ $l$ ≤ 33                | -16 ≤ $h$ ≤ 16<br>-26 ≤ $k$ ≤ 26<br>-31 ≤ $l$ ≤ 31                         |
| Reflections collected                                             | 249926                                                            | 198085                                                                     |
| Independent reflections                                           | 32365<br>$R_{\text{int}} = 0.0620$<br>$R_{\text{sigma}} = 0.0389$ | 29301<br>$R_{\text{int}} = 0.0580$<br>$R_{\text{sigma}} = 0.0354$          |
| Completeness to $\theta = 25.242^\circ$                           | 99.5 %                                                            | 99.9 %                                                                     |
| Data / Restraints / Parameters                                    | 32365/38094/2496                                                  | 29301/34962/2424                                                           |
| Absorption correction<br>$T_{\text{min}}/T_{\text{max}}$ (method) | 0.6767/0.7458<br>(multi-scan)                                     | 0.7063/0.7457<br>(multi-scan)                                              |
| Goodness-of-fit on $F^2$                                          | 1.139                                                             | 1.039                                                                      |
| Final $R$ indexes<br>[ $I \geq 2\sigma(I)$ ]                      | $R_1 = 0.0836$<br>$wR_2 = 0.2396$                                 | $R_1 = 0.0438$<br>$wR_2 = 0.1011$                                          |
| Final $R$ indexes<br>[all data]                                   | $R_1 = 0.1033$<br>$wR_2 = 0.2588$                                 | $R_1 = 0.0577$<br>$wR_2 = 0.1101$                                          |
| Largest peak/hole<br>[eÅ <sup>-3</sup> ]                          | 3.68/-2.51 <sup>a</sup>                                           | 0.81/-1.15                                                                 |

<sup>a</sup> the large residual electron density peaks are near to the ruthenium and silver atom and are likely the result of minor disorders, which could not be resolved.

## DFT Calculations

The structures of all particles were calculated at the B3LYP(D3BJ)/def2-TZVPP level of theory. Solvation energies were calculated with COSMO RS (parameterization BP\_TZVPD\_FINE\_22).

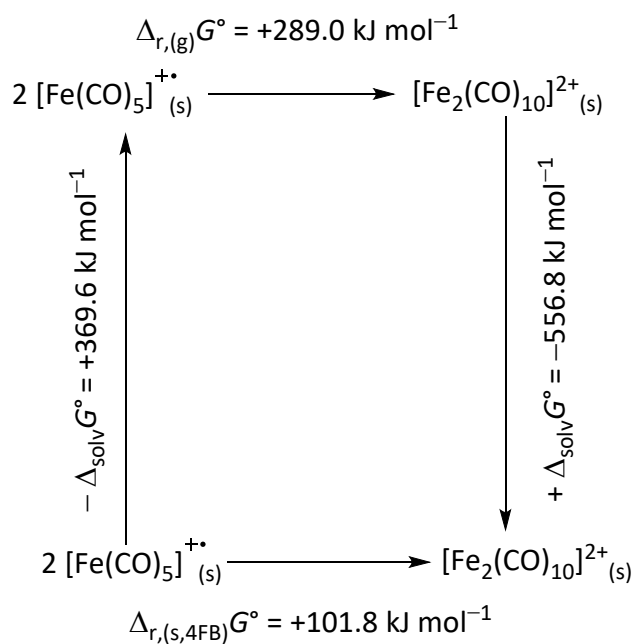

Figure S6: Born-Fajans-Haber cycle of the dimerization of  $[\text{Fe}(\text{CO})_5]^{+\bullet}$  to  $[\text{Fe}_2(\text{CO})_{10}]^{2+}$  in 4FB.

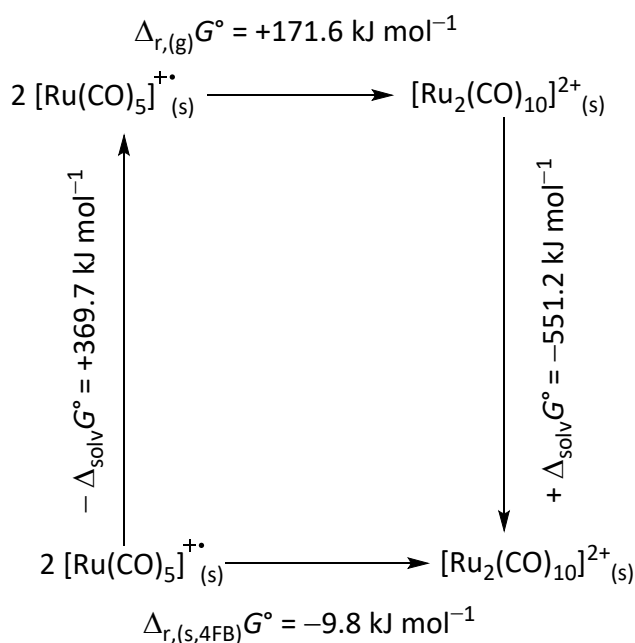

Figure S7: Born-Fajans-Haber cycle of the dimerization of  $[\text{Ru}(\text{CO})_5]^{+\bullet}$  to  $[\text{Ru}_2(\text{CO})_{10}]^{2+}$  in 4FB.

## Coordinates of the DFT-Optimized Structures

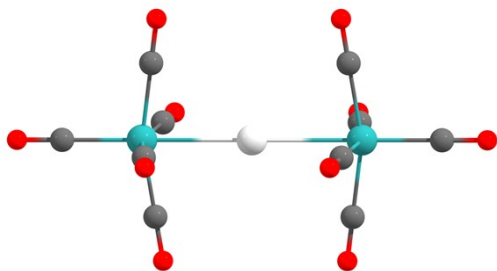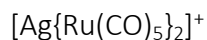

Method: (RI-)B3LYP(D3BJ)/def2-TZVPP

Symmetry: d4h

Cartesian coordinates in Ångström:

```

Ag      0.0000000  0.0000000  0.0000000
Ru     -0.0000000  0.0000000  2.7463282
Ru     -0.0000000  0.0000000 -2.7463282
C      -1.9492940 -0.0000000  2.4630625
O      -3.0690890  0.0000000  2.3014785
C       0.0000000 -1.9492940  2.4630625
O       0.0000000 -3.0690890  2.3014785
C       1.9492940  0.0000000  2.4630625
O       3.0690890  0.0000000  2.3014785
C      -0.0000000  1.9492940  2.4630625
O       0.0000000  3.0690890  2.3014785
C       0.0000000  0.0000000  4.7420670
O       0.0000000  0.0000000  5.8703096
C     -1.9492940  0.0000000 -2.4630625
O     -3.0690890  0.0000000 -2.3014785
C       0.0000000 -1.9492940 -2.4630625
O       0.0000000 -3.0690890 -2.3014785
C       1.9492940  0.0000000 -2.4630625
O       3.0690890  0.0000000 -2.3014785
C     -0.0000000  1.9492940 -2.4630625
O       0.0000000  3.0690890 -2.3014785
C       0.0000000  0.0000000 -4.7420670
O       0.0000000  0.0000000 -5.8703096
    
```

SCF energy GE0OPT = -1470.159987672 H

ZPE = 220.2 kJ/mol

FREEH energy = 296.76 kJ/mol

FREEH entropy = 0.85713 kJ/mol/K

\$vibrational spectrum

| #  | mode | symmetry | wave number<br>cm**(-1) | IR intensity<br>km/mol | selection rules<br>IR | RAMAN |
|----|------|----------|-------------------------|------------------------|-----------------------|-------|
| 1  |      |          | -0.00                   | 0.00000                | -                     | -     |
| 2  |      |          | -0.00                   | 0.00000                | -                     | -     |
| 3  |      |          | -0.00                   | 0.00000                | -                     | -     |
| 4  |      |          | -0.00                   | 0.00000                | -                     | -     |
| 5  |      |          | 0.00                    | 0.00000                | -                     | -     |
| 6  |      |          | 0.00                    | 0.00000                | -                     | -     |
| 7  |      | a1u      | 6.49                    | 0.00000                | NO                    | NO    |
| 8  |      | eu       | 15.26                   | 0.00909                | YES                   | NO    |
| 9  |      | eu       | 15.26                   | 0.00909                | YES                   | NO    |
| 10 |      | eg       | 37.68                   | 0.00000                | NO                    | YES   |
| 11 |      | eg       | 37.68                   | 0.00000                | NO                    | YES   |
| 12 |      | b2u      | 47.17                   | 0.00000                | NO                    | NO    |
| 13 |      | b1g      | 47.25                   | 0.00000                | NO                    | YES   |
| 14 |      | eu       | 61.25                   | 0.19992                | YES                   | NO    |
| 15 |      | eu       | 61.25                   | 0.19992                | YES                   | NO    |
| 16 |      | a1g      | 64.85                   | 0.00000                | NO                    | YES   |
| 17 |      | eg       | 77.51                   | 0.00000                | NO                    | YES   |
| 18 |      | eg       | 77.51                   | 0.00000                | NO                    | YES   |
| 19 |      | eu       | 79.09                   | 0.20797                | YES                   | NO    |
| 20 |      | eu       | 79.09                   | 0.20797                | YES                   | NO    |
| 21 |      | b1u      | 92.01                   | 0.00000                | NO                    | NO    |
| 22 |      | b2g      | 92.07                   | 0.00000                | NO                    | YES   |

|    |     |         |            |     |     |
|----|-----|---------|------------|-----|-----|
| 23 | eg  | 94.83   | 0.00000    | NO  | YES |
| 24 | eg  | 94.83   | 0.00000    | NO  | YES |
| 25 | eu  | 96.23   | 1.06532    | YES | NO  |
| 26 | eu  | 96.23   | 1.06532    | YES | NO  |
| 27 | a2u | 100.25  | 1.09359    | YES | NO  |
| 28 | a1g | 127.91  | 0.00000    | NO  | YES |
| 29 | a2u | 175.08  | 8.27542    | YES | NO  |
| 30 | a1u | 351.05  | 0.00000    | NO  | NO  |
| 31 | a2g | 351.13  | 0.00000    | NO  | NO  |
| 32 | eg  | 360.31  | 0.00000    | NO  | YES |
| 33 | eg  | 360.31  | 0.00000    | NO  | YES |
| 34 | eu  | 361.38  | 3.26148    | YES | NO  |
| 35 | eu  | 361.38  | 3.26148    | YES | NO  |
| 36 | a1g | 378.06  | 0.00000    | NO  | YES |
| 37 | a2u | 378.13  | 44.83253   | YES | NO  |
| 38 | eg  | 387.17  | 0.00000    | NO  | YES |
| 39 | eg  | 387.17  | 0.00000    | NO  | YES |
| 40 | eu  | 389.96  | 64.04219   | YES | NO  |
| 41 | eu  | 389.96  | 64.04219   | YES | NO  |
| 42 | b1g | 401.53  | 0.00000    | NO  | YES |
| 43 | b2u | 401.70  | 0.00000    | NO  | NO  |
| 44 | b2u | 426.76  | 0.00000    | NO  | NO  |
| 45 | b1g | 427.52  | 0.00000    | NO  | YES |
| 46 | a2u | 440.20  | 0.00388    | YES | NO  |
| 47 | a1g | 440.91  | 0.00000    | NO  | YES |
| 48 | eg  | 478.62  | 0.00000    | NO  | YES |
| 49 | eg  | 478.62  | 0.00000    | NO  | YES |
| 50 | eu  | 480.03  | 35.65796   | YES | NO  |
| 51 | eu  | 480.03  | 35.65796   | YES | NO  |
| 52 | b1u | 506.09  | 0.00000    | NO  | NO  |
| 53 | b2g | 507.02  | 0.00000    | NO  | YES |
| 54 | eg  | 588.48  | 0.00000    | NO  | YES |
| 55 | eg  | 588.48  | 0.00000    | NO  | YES |
| 56 | eu  | 590.46  | 124.62124  | YES | NO  |
| 57 | eu  | 590.46  | 124.62124  | YES | NO  |
| 58 | a2u | 603.74  | 529.31866  | YES | NO  |
| 59 | a1g | 618.95  | 0.00000    | NO  | YES |
| 60 | eg  | 2132.89 | 0.00000    | NO  | YES |
| 61 | eg  | 2132.89 | 0.00000    | NO  | YES |
| 62 | eu  | 2143.66 | 2047.63210 | YES | NO  |
| 63 | eu  | 2143.66 | 2047.63210 | YES | NO  |
| 64 | b2u | 2149.23 | 0.00000    | NO  | NO  |
| 65 | b1g | 2155.60 | 0.00000    | NO  | YES |
| 66 | a2u | 2164.62 | 891.12771  | YES | NO  |
| 67 | a1g | 2167.44 | 0.00000    | NO  | YES |
| 68 | a2u | 2210.57 | 591.77669  | YES | NO  |
| 69 | a1g | 2226.51 | 0.00000    | NO  | YES |



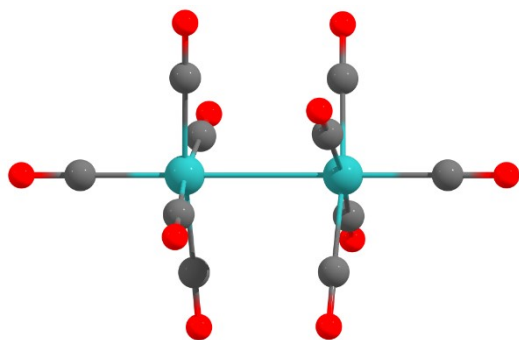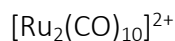

Method: (RI-)B3LYP(D3BJ)/def2-TZVPP

Symmetry: d4d

Cartesian coordinates in Ångström:

```

Ru  -0.0000000  -0.0000000  -1.5074524
Ru  -0.0000000   0.0000000   1.5074524
C   0.7612322   1.8377772   1.4138817
C   0.0000000  -0.0000000   3.5005681
C   1.8377772  -0.7612322   1.4138817
C  -1.8377772   0.7612322   1.4138817
C  -0.7612322  -1.8377772   1.4138817
C   0.7612322  -1.8377772  -1.4138817
C   1.8377772   0.7612322  -1.4138817
C  -1.8377772  -0.7612322  -1.4138817
C  -0.7612322   1.8377772  -1.4138817
C   0.0000000  -0.0000000  -3.5005681
O   1.1907495   2.8747236   1.3665106
O   0.0000000   0.0000000   4.6216200
O   2.8747236  -1.1907495   1.3665106
O  -1.1907495  -2.8747236   1.3665106
O  -2.8747236   1.1907495   1.3665106
O  -2.8747236  -1.1907495  -1.3665106
O  -1.1907495   2.8747236  -1.3665106
O   0.0000000   0.0000000  -4.6216200
O   2.8747236   1.1907495  -1.3665106
O   1.1907495  -2.8747236  -1.3665106

```

SCF energy GE0OPT = -1322.735888171 H

ZPE = 224.1 kJ/mol

FREEH energy = 293.09 kJ/mol

FREEH entropy = 0.74135 kJ/mol/K

Vibrational spectrum

| #  | mode | symmetry | wave number<br>cm**(-1) | IR intensity<br>km/mol | selection rules<br>IR | RAMAN |
|----|------|----------|-------------------------|------------------------|-----------------------|-------|
| 1  |      |          | -0.00                   | 0.00000                | -                     | -     |
| 2  |      |          | -0.00                   | 0.00000                | -                     | -     |
| 3  |      |          | 0.00                    | 0.00000                | -                     | -     |
| 4  |      |          | 0.00                    | 0.00000                | -                     | -     |
| 5  |      |          | 0.00                    | 0.00000                | -                     | -     |
| 6  |      |          | 0.00                    | 0.00000                | -                     | -     |
| 7  |      | b1       | 33.77                   | 0.00000                | NO                    | NO    |
| 8  |      | e1       | 55.36                   | 0.06306                | YES                   | NO    |
| 9  |      | e1       | 55.36                   | 0.06306                | YES                   | NO    |
| 10 |      | e3       | 60.53                   | 0.00000                | NO                    | YES   |
| 11 |      | e3       | 60.53                   | 0.00000                | NO                    | YES   |
| 12 |      | e2       | 76.74                   | 0.00000                | NO                    | YES   |
| 13 |      | e2       | 76.74                   | 0.00000                | NO                    | YES   |
| 14 |      | e3       | 82.73                   | 0.00000                | NO                    | YES   |
| 15 |      | e3       | 82.73                   | 0.00000                | NO                    | YES   |
| 16 |      | e1       | 91.45                   | 0.79500                | YES                   | NO    |
| 17 |      | e1       | 91.45                   | 0.79500                | YES                   | NO    |
| 18 |      | a1       | 91.80                   | 0.00000                | NO                    | YES   |
| 19 |      | e2       | 94.31                   | 0.00000                | NO                    | YES   |

|    |    |         |            |     |     |
|----|----|---------|------------|-----|-----|
| 20 | e2 | 94.31   | 0.00000    | NO  | YES |
| 21 | e1 | 99.28   | 0.22526    | YES | NO  |
| 22 | e1 | 99.28   | 0.22526    | YES | NO  |
| 23 | e3 | 102.72  | 0.00000    | NO  | YES |
| 24 | e3 | 102.72  | 0.00000    | NO  | YES |
| 25 | b2 | 107.00  | 1.13884    | YES | NO  |
| 26 | a1 | 141.30  | 0.00000    | NO  | YES |
| 27 | a2 | 347.74  | 0.00000    | NO  | NO  |
| 28 | b1 | 349.76  | 0.00000    | NO  | NO  |
| 29 | e3 | 351.92  | 0.00000    | NO  | YES |
| 30 | e3 | 351.92  | 0.00000    | NO  | YES |
| 31 | e1 | 357.40  | 41.68507   | YES | NO  |
| 32 | e1 | 357.40  | 41.68507   | YES | NO  |
| 33 | b2 | 367.97  | 0.58052    | YES | NO  |
| 34 | a1 | 374.12  | 0.00000    | NO  | YES |
| 35 | e1 | 386.35  | 20.28065   | YES | NO  |
| 36 | e1 | 386.35  | 20.28065   | YES | NO  |
| 37 | e3 | 387.79  | 0.00000    | NO  | YES |
| 38 | e3 | 387.79  | 0.00000    | NO  | YES |
| 39 | e2 | 403.72  | 0.00000    | NO  | YES |
| 40 | e2 | 403.72  | 0.00000    | NO  | YES |
| 41 | b2 | 412.96  | 18.38429   | YES | NO  |
| 42 | a1 | 419.42  | 0.00000    | NO  | YES |
| 43 | e2 | 481.58  | 0.00000    | NO  | YES |
| 44 | e2 | 481.58  | 0.00000    | NO  | YES |
| 45 | e3 | 493.26  | 0.00000    | NO  | YES |
| 46 | e3 | 493.26  | 0.00000    | NO  | YES |
| 47 | e2 | 499.25  | 0.00000    | NO  | YES |
| 48 | e2 | 499.25  | 0.00000    | NO  | YES |
| 49 | e1 | 499.99  | 16.96252   | YES | NO  |
| 50 | e1 | 499.99  | 16.96252   | YES | NO  |
| 51 | e3 | 579.87  | 0.00000    | NO  | YES |
| 52 | e3 | 579.87  | 0.00000    | NO  | YES |
| 53 | e1 | 582.38  | 108.78615  | YES | NO  |
| 54 | e1 | 582.38  | 108.78615  | YES | NO  |
| 55 | b2 | 594.99  | 422.30254  | YES | NO  |
| 56 | a1 | 613.62  | 0.00000    | NO  | YES |
| 57 | e3 | 2193.05 | 0.00000    | NO  | YES |
| 58 | e3 | 2193.05 | 0.00000    | NO  | YES |
| 59 | e1 | 2210.18 | 1354.74768 | YES | NO  |
| 60 | e1 | 2210.18 | 1354.74768 | YES | NO  |
| 61 | b2 | 2218.56 | 114.23267  | YES | NO  |
| 62 | e2 | 2222.45 | 0.00000    | NO  | YES |
| 63 | e2 | 2222.45 | 0.00000    | NO  | YES |
| 64 | a1 | 2231.93 | 0.00000    | NO  | YES |
| 65 | b2 | 2254.66 | 833.25172  | YES | NO  |
| 66 | a1 | 2284.38 | 0.00000    | NO  | YES |

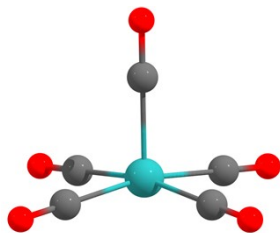

[Ru(CO)<sub>5</sub>]<sup>+</sup>

Method: (RI-)B3LYP(D3BJ)/def2-TZVPP

Symmetry: c4v

Cartesian coordinates in Ångström:

```

Ru  -0.000000  0.000000  0.2869456
C   0.000000  1.9895393  0.4797727
C   0.000000  -1.9895393  0.4797727
C   0.000000  0.000000  -1.7000016
O   0.000000  -3.1091301  0.5798222
O   0.000000  0.000000  -2.8253236
O  -0.000000  3.1091301  0.5798222
C  -1.9895393  0.000000  0.4797727
C   1.9895393  0.000000  0.4797727
O   3.1091301  0.000000  0.5798222
O  -3.1091301  -0.000000  0.5798222

```

SCF energy GEOOPT = -661.3884273765 H

ZPE = 107.6 kJ/mol

FREEH energy = 140.79 kJ/mol

FREEH entropy = 0.46592 kJ/mol/K

Vibrational spectrum

| #  | mode | symmetry | wave number<br>cm <sup>-1</sup> | IR intensity<br>km/mol | selection rules<br>IR | RAMAN |
|----|------|----------|---------------------------------|------------------------|-----------------------|-------|
| 1  |      |          | -0.00                           | 0.00000                | -                     | -     |
| 2  |      |          | -0.00                           | 0.00000                | -                     | -     |
| 3  |      |          | -0.00                           | 0.00000                | -                     | -     |
| 4  |      |          | 0.00                            | 0.00000                | -                     | -     |
| 5  |      |          | 0.00                            | 0.00000                | -                     | -     |
| 6  |      |          | 0.00                            | 0.00000                | -                     | -     |
| 7  |      | b1       | 59.08                           | 0.00000                | NO                    | YES   |
| 8  |      | e        | 77.24                           | 0.05417                | YES                   | YES   |
| 9  |      | e        | 77.24                           | 0.05417                | YES                   | YES   |
| 10 |      | b2       | 90.18                           | 0.00000                | NO                    | YES   |
| 11 |      | e        | 92.70                           | 0.77780                | YES                   | YES   |
| 12 |      | e        | 92.70                           | 0.77780                | YES                   | YES   |
| 13 |      | a1       | 97.93                           | 0.27607                | YES                   | YES   |
| 14 |      | e        | 319.05                          | 1.71216                | YES                   | YES   |
| 15 |      | e        | 319.05                          | 1.71216                | YES                   | YES   |
| 16 |      | a2       | 337.09                          | 0.00000                | NO                    | NO    |
| 17 |      | e        | 351.54                          | 32.47559               | YES                   | YES   |
| 18 |      | e        | 351.54                          | 32.47559               | YES                   | YES   |
| 19 |      | a1       | 352.80                          | 8.53439                | YES                   | YES   |
| 20 |      | b1       | 375.76                          | 0.00000                | NO                    | YES   |
| 21 |      | a1       | 408.20                          | 5.30389                | YES                   | YES   |
| 22 |      | b1       | 435.68                          | 0.00000                | NO                    | YES   |
| 23 |      | e        | 448.57                          | 7.02451                | YES                   | YES   |
| 24 |      | e        | 448.57                          | 7.02451                | YES                   | YES   |
| 25 |      | b2       | 491.96                          | 0.00000                | NO                    | YES   |
| 26 |      | e        | 563.89                          | 60.49025               | YES                   | YES   |
| 27 |      | e        | 563.89                          | 60.49025               | YES                   | YES   |
| 28 |      | a1       | 578.51                          | 73.90819               | YES                   | YES   |
| 29 |      | a1       | 2192.53                         | 465.22906              | YES                   | YES   |
| 30 |      | e        | 2193.40                         | 981.95822              | YES                   | YES   |
| 31 |      | e        | 2193.40                         | 981.95822              | YES                   | YES   |
| 32 |      | b1       | 2209.66                         | 0.00000                | NO                    | YES   |
| 33 |      | a1       | 2263.12                         | 4.94041                | YES                   | YES   |

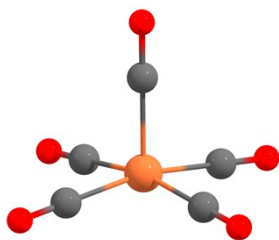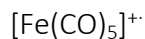

Method: (RI-)B3LYP(D3BJ)/def2-TZVPP

Symmetry: c4v

Cartesian coordinates in Ångström:

```

Fe  0.000000  0.000000  0.2633004
C   0.000000  1.8816110  0.4688894
C   0.000000 -1.8816110  0.4688894
C  -0.000000  0.0000000 -1.6769927
O  -0.000000 -2.9983003  0.5872300
O   0.000000  0.0000000 -2.8002625
O   0.000000  2.9983003  0.5872300
C  -1.8816110  0.0000000  0.4688894
C   1.8816110  0.0000000  0.4688894
O   2.9983003 -0.0000000  0.5872300
O  -2.9983003  0.0000000  0.5872300
  
```

SCF energy GE0OPT = -1830.110841627 H

ZPE = 108.3 kJ/mol

FREEH energy = 141.38 kJ/mol

FREEH entropy = 0.46233 kJ/mol/K

Vibrational spectrum

| #  | mode | symmetry | wave number<br>cm <sup>-1</sup> | IR intensity<br>km/mol | selection rules<br>IR | RAMAN |
|----|------|----------|---------------------------------|------------------------|-----------------------|-------|
| 1  |      |          | -0.00                           | 0.00000                | -                     | -     |
| 2  |      |          | -0.00                           | 0.00000                | -                     | -     |
| 3  |      |          | -0.00                           | 0.00000                | -                     | -     |
| 4  |      |          | 0.00                            | 0.00000                | -                     | -     |
| 5  |      |          | 0.00                            | 0.00000                | -                     | -     |
| 6  |      |          | 0.00                            | 0.00000                | -                     | -     |
| 7  |      | b1       | 46.20                           | 0.00000                | NO                    | YES   |
| 8  |      | e        | 77.19                           | 0.04337                | YES                   | YES   |
| 9  |      | e        | 77.19                           | 0.04337                | YES                   | YES   |
| 10 |      | b2       | 95.53                           | 0.00000                | NO                    | YES   |
| 11 |      | e        | 99.54                           | 1.58517                | YES                   | YES   |
| 12 |      | e        | 99.54                           | 1.58517                | YES                   | YES   |
| 13 |      | a1       | 103.75                          | 1.03764                | YES                   | YES   |
| 14 |      | e        | 313.47                          | 0.02162                | YES                   | YES   |
| 15 |      | e        | 313.47                          | 0.02162                | YES                   | YES   |
| 16 |      | a1       | 320.14                          | 1.40158                | YES                   | YES   |
| 17 |      | a2       | 337.97                          | 0.00000                | NO                    | NO    |
| 18 |      | b1       | 344.16                          | 0.00000                | NO                    | YES   |
| 19 |      | a1       | 363.19                          | 6.15358                | YES                   | YES   |
| 20 |      | e        | 390.20                          | 24.54554               | YES                   | YES   |
| 21 |      | e        | 390.20                          | 24.54554               | YES                   | YES   |
| 22 |      | b1       | 417.34                          | 0.00000                | NO                    | YES   |
| 23 |      | e        | 467.56                          | 3.54875                | YES                   | YES   |
| 24 |      | e        | 467.56                          | 3.54875                | YES                   | YES   |
| 25 |      | b2       | 533.90                          | 0.00000                | NO                    | YES   |
| 26 |      | a1       | 572.00                          | 52.81826               | YES                   | YES   |
| 27 |      | e        | 585.45                          | 74.67875               | YES                   | YES   |
| 28 |      | e        | 585.45                          | 74.67875               | YES                   | YES   |
| 29 |      | e        | 2204.48                         | 923.28287              | YES                   | YES   |
| 30 |      | e        | 2204.48                         | 923.28287              | YES                   | YES   |
| 31 |      | a1       | 2209.86                         | 397.77939              | YES                   | YES   |
| 32 |      | b1       | 2219.27                         | 0.00000                | NO                    | YES   |
| 33 |      | a1       | 2263.42                         | 0.85225                | YES                   | YES   |

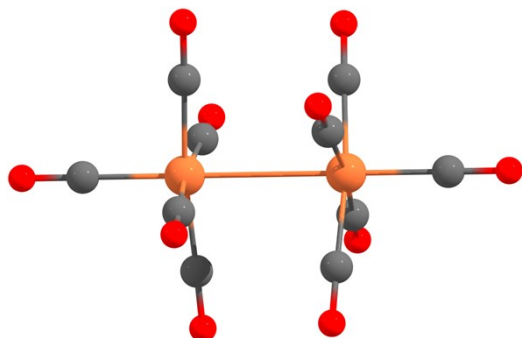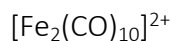

Method: (RI-)B3LYP(D3BJ)/def2-TZVPP  
Symmetry: d4d

Cartesian coordinates in Ångström:

```

Fe  -0.000000  0.000000  -1.4857145
Fe  -0.000000  -0.000000  1.4857145
C    0.000000  0.000000  3.3644914
C    1.7314490 -0.7171896  1.3797556
C    1.7314490  0.7171896  -1.3797556
O    0.000000  0.000000  4.4843576
C    0.000000  0.000000  -3.3644914
O    2.7681197  1.1465927  -1.3331588
O    2.7681197 -1.1465927  1.3331588
O    0.000000  0.000000  -4.4843576
C   -0.7171896  1.7314490  -1.3797556
C   -0.7171896 -1.7314490  1.3797556
C    0.7171896 -1.7314490  -1.3797556
O   -1.1465927  2.7681197  -1.3331588
C   -1.7314490 -0.7171896  -1.3797556
O   -2.7681197  1.1465927  1.3331588
O   -2.7681197 -1.1465927  -1.3331588
O    1.1465927 -2.7681197  -1.3331588
C    0.7171896  1.7314490  1.3797556
O   -1.1465927 -2.7681197  1.3331588
O    1.1465927  2.7681197  1.3331588
C   -1.7314490  0.7171896  1.3797556
  
```

SCF energy GE0OPT = -3660.138839594 H

ZPE = 227.7 kJ/mol

FREEH energy = 294.98 kJ/mol

FREEH entropy = 0.71755 kJ/mol/K

Vibrational spectrum

| #  | mode | symmetry | wave number<br>cm**(-1) | IR intensity<br>km/mol | selection rules |       |
|----|------|----------|-------------------------|------------------------|-----------------|-------|
|    |      |          |                         |                        | IR              | RAMAN |
| 1  |      |          | -0.00                   | 0.00000                | -               | -     |
| 2  |      |          | -0.00                   | 0.00000                | -               | -     |
| 3  |      |          | -0.00                   | 0.00000                | -               | -     |
| 4  |      |          | 0.00                    | 0.00000                | -               | -     |
| 5  |      |          | 0.00                    | 0.00000                | -               | -     |
| 6  |      |          | 0.00                    | 0.00000                | -               | -     |
| 7  |      | b1       | 39.73                   | 0.00000                | NO              | NO    |
| 8  |      | e1       | 58.37                   | 0.10998                | YES             | NO    |
| 9  |      | e1       | 58.37                   | 0.10998                | YES             | NO    |
| 10 |      | e3       | 63.32                   | 0.00000                | NO              | YES   |
| 11 |      | e3       | 63.32                   | 0.00000                | NO              | YES   |
| 12 |      | e2       | 79.24                   | 0.00000                | NO              | YES   |
| 13 |      | e2       | 79.24                   | 0.00000                | NO              | YES   |
| 14 |      | e3       | 87.67                   | 0.00000                | NO              | YES   |
| 15 |      | e3       | 87.67                   | 0.00000                | NO              | YES   |
| 16 |      | e1       | 99.90                   | 1.08582                | YES             | NO    |
| 17 |      | e1       | 99.90                   | 1.08582                | YES             | NO    |
| 18 |      | e2       | 101.82                  | 0.00000                | NO              | YES   |
| 19 |      | e2       | 101.82                  | 0.00000                | NO              | YES   |
| 20 |      | a1       | 105.33                  | 0.00000                | NO              | YES   |
| 21 |      | e1       | 109.40                  | 0.90835                | YES             | NO    |
| 22 |      | e1       | 109.40                  | 0.90835                | YES             | NO    |
| 23 |      | e3       | 112.58                  | 0.00000                | NO              | YES   |
| 24 |      | e3       | 112.58                  | 0.00000                | NO              | YES   |
| 25 |      | b2       | 121.04                  | 0.44163                | YES             | NO    |

|    |    |         |            |     |     |
|----|----|---------|------------|-----|-----|
| 26 | a1 | 211.89  | 0.00000    | NO  | YES |
| 27 | a2 | 351.64  | 0.00000    | NO  | NO  |
| 28 | b1 | 352.86  | 0.00000    | NO  | NO  |
| 29 | b2 | 358.85  | 50.34615   | YES | NO  |
| 30 | e3 | 366.30  | 0.00000    | NO  | YES |
| 31 | e3 | 366.30  | 0.00000    | NO  | YES |
| 32 | e2 | 373.50  | 0.00000    | NO  | YES |
| 33 | e2 | 373.50  | 0.00000    | NO  | YES |
| 34 | a1 | 374.83  | 0.00000    | NO  | YES |
| 35 | e1 | 379.22  | 1.06620    | YES | NO  |
| 36 | e1 | 379.22  | 1.06620    | YES | NO  |
| 37 | b2 | 391.46  | 7.97426    | YES | NO  |
| 38 | a1 | 411.36  | 0.00000    | NO  | YES |
| 39 | e1 | 422.46  | 28.23573   | YES | NO  |
| 40 | e1 | 422.46  | 28.23573   | YES | NO  |
| 41 | e3 | 427.57  | 0.00000    | NO  | YES |
| 42 | e3 | 427.57  | 0.00000    | NO  | YES |
| 43 | e2 | 452.61  | 0.00000    | NO  | YES |
| 44 | e2 | 452.61  | 0.00000    | NO  | YES |
| 45 | e3 | 511.62  | 0.00000    | NO  | YES |
| 46 | e3 | 511.62  | 0.00000    | NO  | YES |
| 47 | e1 | 524.35  | 7.33156    | YES | NO  |
| 48 | e1 | 524.35  | 7.33156    | YES | NO  |
| 49 | e2 | 542.95  | 0.00000    | NO  | YES |
| 50 | e2 | 542.95  | 0.00000    | NO  | YES |
| 51 | e3 | 605.46  | 0.00000    | NO  | YES |
| 52 | e3 | 605.46  | 0.00000    | NO  | YES |
| 53 | b2 | 607.67  | 440.08946  | YES | NO  |
| 54 | e1 | 607.85  | 140.60405  | YES | NO  |
| 55 | e1 | 607.85  | 140.60405  | YES | NO  |
| 56 | a1 | 636.07  | 0.00000    | NO  | YES |
| 57 | e3 | 2201.11 | 0.00000    | NO  | YES |
| 58 | e3 | 2201.11 | 0.00000    | NO  | YES |
| 59 | b2 | 2211.02 | 162.08006  | YES | NO  |
| 60 | e1 | 2218.09 | 1222.51487 | YES | NO  |
| 61 | e1 | 2218.09 | 1222.51487 | YES | NO  |
| 62 | e2 | 2219.61 | 0.00000    | NO  | YES |
| 63 | e2 | 2219.61 | 0.00000    | NO  | YES |
| 64 | a1 | 2240.84 | 0.00000    | NO  | YES |
| 65 | b2 | 2249.43 | 1082.87092 | YES | NO  |
| 66 | a1 | 2277.52 | 0.00000    | NO  | YES |

\$end
